# Supplementary material
Source: publisher figshare collection journal article supplement (https://geolsoc.figshare.com/ndownloader/files/9474850)
Supplement: Supplementary file 1 [file 9474850]

## Sheet: Table 1 - ME&TE
Table S1. XRF whole-rock major (wt %) and trace (µg/g) element data and CIPW norm calculations from the granites at Glenmacnass Waterfall
	Foliated	Equigranular	Megacrystic
	13Gs11	13Gs12	13Gs03
	Granite	Granite	Granite
Grid	O 11502	O 11502	O 11498
ref.	02822	02822	02817
SiO2	71.6	73.73	70.29
TiO2	0.272	0.095	0.302
Al2O3	15.27	14.73	15.61
Fe2O3	0.153294	0.0541036	0.197378
FeO	1.37671	0.485896	1.77262
MnO	< 0.02	< 0.02	0.06
MgO	0.4	0.07	0.49
CaO	1.22	0.89	1.42
Na2O	3.83	3.35	3.85
K2O	3.85	4.69	4.18
P2O5	0.16	0.1	0.16
SO3	< 0.02	< 0.02	< 0.02
LOI	0.83	1.163	0.73
SUM	99.007	99.364	99.057
Sc	2	2	3
V	23	4	25
Cr	48	5	56
Ni	10	< 4	12
Cu	2	< 2	3
Zn	43	18	60
Ga	23	21	24
Cs	15	11	11
Rb	185	187	201
Sr	155	133	210
Y	10	5	9
Zr	95	30	122
Nb	6	6	8
Ba	284	191	482
Ce	30	7	42
Gd	4	3	5
La	13	3	22
Nd	14	4	20
Pr	7	< 4	7
Sm	5	6	6
Pb	30	33	33
Th	6.9	1.3	7.7
U	3.6	2.1	3.1
Mg#	34.1202	20.4328	33.0092
PI	1.45872	1.39124	1.43762
ASI	1.2217	1.21848	1.17787
CIPW Norm calculations
Quartz	31.72	34.81	27.9
Plagioclase	38.81	32.97	39.94
Orthoclase	24.52	29.41	26.74
Corundum	2	1.84	1.69
Hypersthene	2.2	0.62	2.9
Ilmenite	0.3	0.11	0.33
Magnetite	0.11	0.04	0.15
Apatite	0.32	0.2	0.32
Zircon	0.01	0	0.02
Chromite	0.01	0	0.01
Grid references are in Irish National Grid.
Mg# (Magnesium Number) = 100xMg/[Mg+Fe2+];
PI (Per-alkalinity index) = Al/(Na+K);
ASI (Aluminium Saturation Index) = Al/(K+Na+Ca-1.63xP).
